# Supplementary material
Source: PubMed Central journal article supplement (PMC9419987)
Supplement: Supp_Data.pdf [file Supp_Data.pdf]

## Supplementary Material S1

Search terms were: (((((((((((acupuncture[mesh] OR acupuncture therapy[mesh] OR acupunctur\*[title/abstract] OR medicine, Chinese traditional[mesh] OR traditional Chinese medicine[title/abstract] OR Chinese traditional medicine[title/abstract] OR Chinese medicine[title/abstract] OR massage[mesh] OR massage[title/abstract] OR naturopathy[mesh] OR naturopath\*[title/abstract] OR chiropractic[mesh] OR manipulation, chiropractic[mesh] OR chiropractic\*[title/abstract] OR osteopathic medicine[mesh] OR manipulation, osteopathic[mesh] OR osteopath\*[title/abstract] OR yoga[mesh] OR yoga[title/abstract] OR (multidisciplinary[title/abstract] AND (integrative[title/abstract] OR complementary[title/abstract] OR alternative[title/abstract])) OR (consultation\*[title/abstract] AND (integrative[title/abstract] OR complementary[title/abstract] OR alternative[title/abstract])) OR manual therap\*[title/abstract] OR integrative medicine[mesh] OR integrative medicine[title/abstract] OR integrative oncology[title/abstract] OR integrative therapy[title/abstract] OR integrative therapies[title/abstract] OR integrative health[title/abstract] OR complementary medicine[title/abstract] OR complementary therapy[title/abstract] OR complementary therapies[title/abstract] OR complementary health approach\*[title/abstract] OR complementary and alternative medicine[title/abstract] OR complementary and alternative therap\*[title/abstract] OR alternative medicine[title/abstract] OR integrative approach\*[title/abstract]))) AND ((Cohort Studies[mesh] OR Longitudinal Studies[mesh] OR Prospective Studies[mesh] OR Retrospective Studies[mesh] OR Case-Control Studies[mesh] OR cohort stud\*[title/abstract] OR prospective[title/abstract] OR retrospective[title/abstract] OR registry stud\*[title/abstract] OR registry-based stud\*[title/abstract] OR observational stud\*[title/abstract] OR longitudinal stud\*[title/abstract] OR descriptive analysis[title/abstract] OR case-control\*[title/abstract] OR historical stud\*[title/abstract] OR long-term stud\*[title/abstract] OR follow-up stud\*[title/abstract] OR follow-up evaluat\*[title/abstract] OR follow-up[title] OR effect\*[title] OR outcome\*[title]))) NOT ((pediatric[title/abstract] OR fetal[title/abstract] OR child[title/abstract] OR children[title/abstract] OR baby[title/abstract] OR babies[title/abstract] OR infant\*[title/abstract] OR newborn\*[title/abstract] OR neonat\*[title/abstract] OR adolescen\*[title/abstract] OR teen\*[title/abstract] OR teenager\*[title/abstract]))) NOT ((animal\*[title/abstract] OR mouse[title/abstract] OR mice[title/abstract] OR rats[title/abstract] OR dog[title/abstract] OR dogs[title/abstract] OR cat[title/abstract] OR cats[title/abstract] OR pig[title/abstract] OR pigs[title/abstract] OR canine[title/abstract] OR feline[title/abstract] OR porcine[title/abstract]))) NOT ((telemedicine[mesh] OR telemedicine[title/abstract] OR telehealth[title/abstract] OR teletherap\*[title/abstract] OR telerehab\*[title/abstract] OR mobile phone\*[title/abstract] OR mobile app\*[title/abstract]))) NOT ((Adaptive Clinical Trials as Topic[Mesh] OR Non-Randomized Controlled Trials as Topic[mesh] OR Clinical Trial Protocols as Topic[mesh] OR Controlled Clinical Trials as Topic[mesh] OR Clinical Trials as Topic[mesh] OR Pragmatic Clinical Trials as Topic[mesh] OR Randomized Controlled Trials as Topic[mesh] OR Adaptive Clinical Trial[Publication Type] OR Clinical Trial Protocol[Publication Type] OR Clinical Trial, Phase II[Publication Type] OR Clinical Trial, Phase II[Publication Type] OR Clinical Trial, Phase III[Publication Type] OR Clinical Trial, Phase IV[Publication Type] OR Pragmatic Clinical Trial[Publication Type] OR Controlled Clinical Trial[Publication Type] OR Randomized Controlled Trial[Publication Type] OR review\*[title] OR protocol\*[title] OR randomized[title] OR randomised[title] OR clinical trial\*[title] OR case report\*[title/abstract] OR cross-sectional[title/abstract] OR controlled trial\*[title/abstract]))) AND english[lang].
